# Supplementary material for: CK1ε and p120‐catenin control Ror2 function in noncanonical Wnt signaling
Source: PubMed Central journal article supplement (PMC5928365; doi:10.1002/1878-0261.12184), 2018-03-14
Supplement: MOL2-12-611-s002.pdf [file MOL2-12-611-s002.pdf]

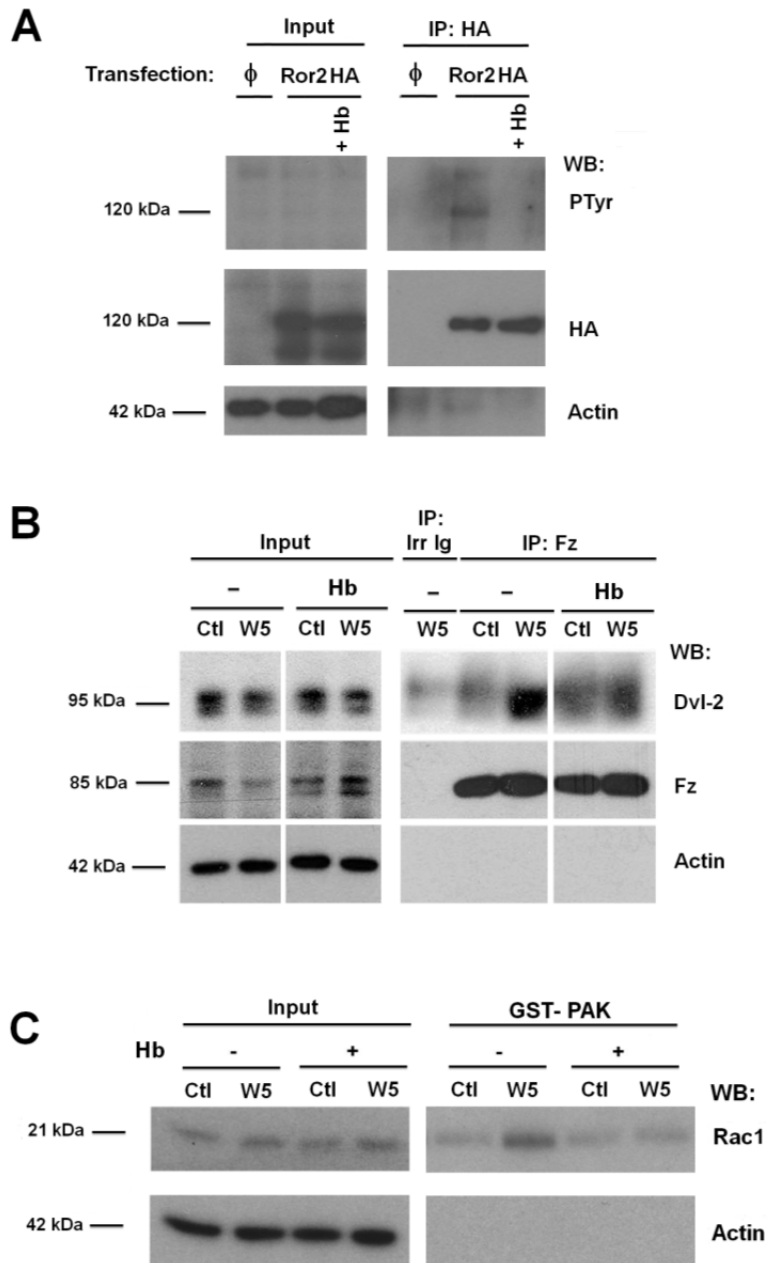

**Figure S2**
