# Supplementary material for: CK1ε and p120‐catenin control Ror2 function in noncanonical Wnt signaling
Source: PubMed Central journal article supplement (PMC5928365; doi:10.1002/1878-0261.12184), 2018-03-14
Supplement: MOL2-12-611-s014.pdf [file MOL2-12-611-s014.pdf]

## CK1 $\epsilon$ and p120-catenin control Ror2 function in non-canonical Wnt signaling

Josué Curto, Beatriz Del Valle-Pérez, Aida Villarroel, Guillem Fuertes, Meritxell Vinyoles,

Raúl Peña, Antonio García de Herreros and Mireia Duñach

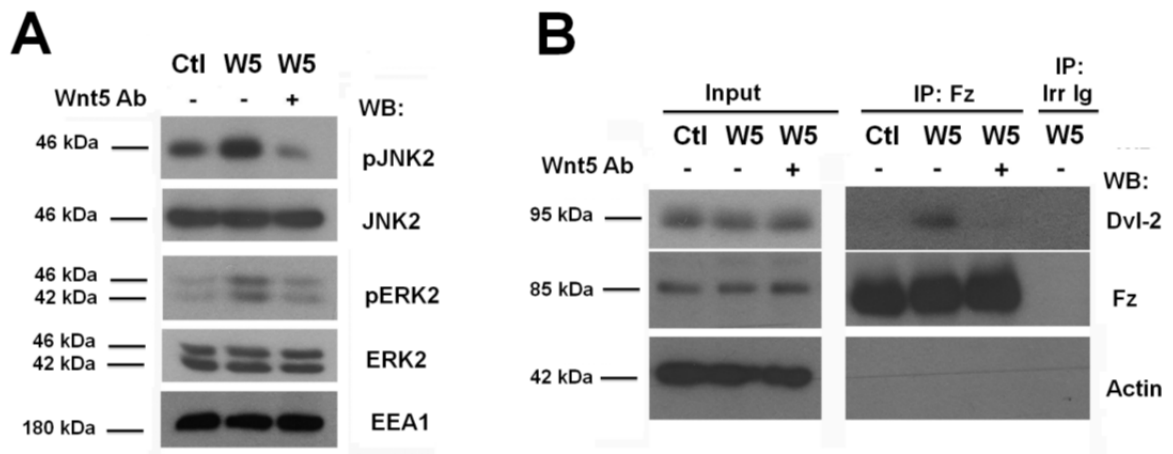

**Fig. S1. A Wnt5a antibody prevents the stimulation of JNK2 and ERK2 Serine kinases and the association of Fz with Dvl-2 induced by Wnt5a.** Control or Wnt5a-conditioned medium were incubated with a Wnt5a mab or an irrelevant IgG (both  $2 \mu\text{g.mL}^{-1}$ ) for 1 h. HEK293T cells were treated for 10 min with the indicated conditional medium. Extracts were analyzed by WB with the indicated antibodies (**A**). JNK2 and ERK2 phosphorylation were determined with anti-phospho antibodies against JNK and anti ERK (see Fig. 1). (**B**) Fz2 was immunoprecipitated and associated Dvl2 was detected by WB.

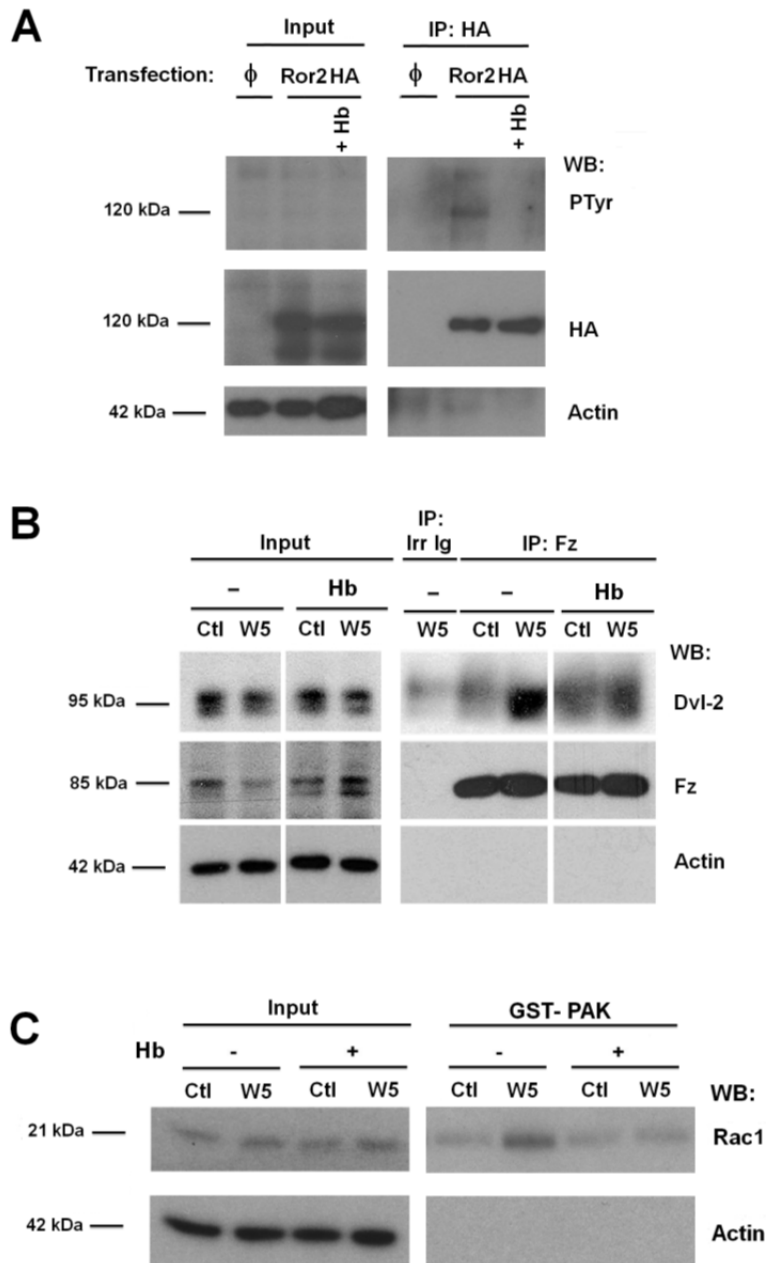

**Fig. S2. The tyrosine kinase inhibitor Herbimycin affects Wnt5a signaling.** When indicated, HEK293T cells were pretreated for 1 hour with Herbimycin (Hb, 20 ng.mL<sup>-1</sup>) and stimulated with control or Wnt5a-conditioned medium for additional 5 min. (A) Ror2-HA was immunoprecipitated from HEK293T cell extracts overexpressing Ror2-HA and immunocomplexes were analyzed by WB. (B, C) HEK293T cells were pretreated with inhibitors; then, cells were stimulated with control or Wnt5a-conditioned medium for one additional hour supplemented with the inhibitor when indicated. Fz2 was immunoprecipitated from cell extracts and associated Dvl2 detected by WB (B), or GST-PAK pull-down assays were performed and active Rac1 analyzed by WB (C).

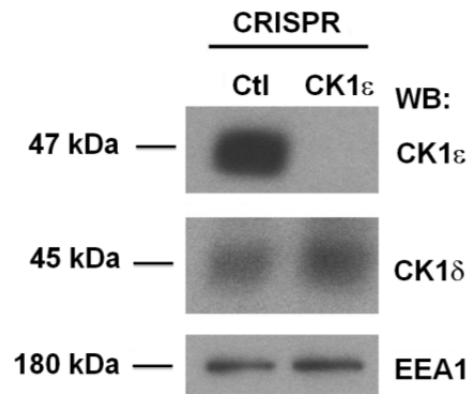

**Fig. S3. CK1 $\epsilon$  CRISPR cells contain unaltered levels of CK1 $\delta$ .** Levels of the indicated proteins were determined by WB in total extracts from control or CK1 $\epsilon$  CRISPR cells.

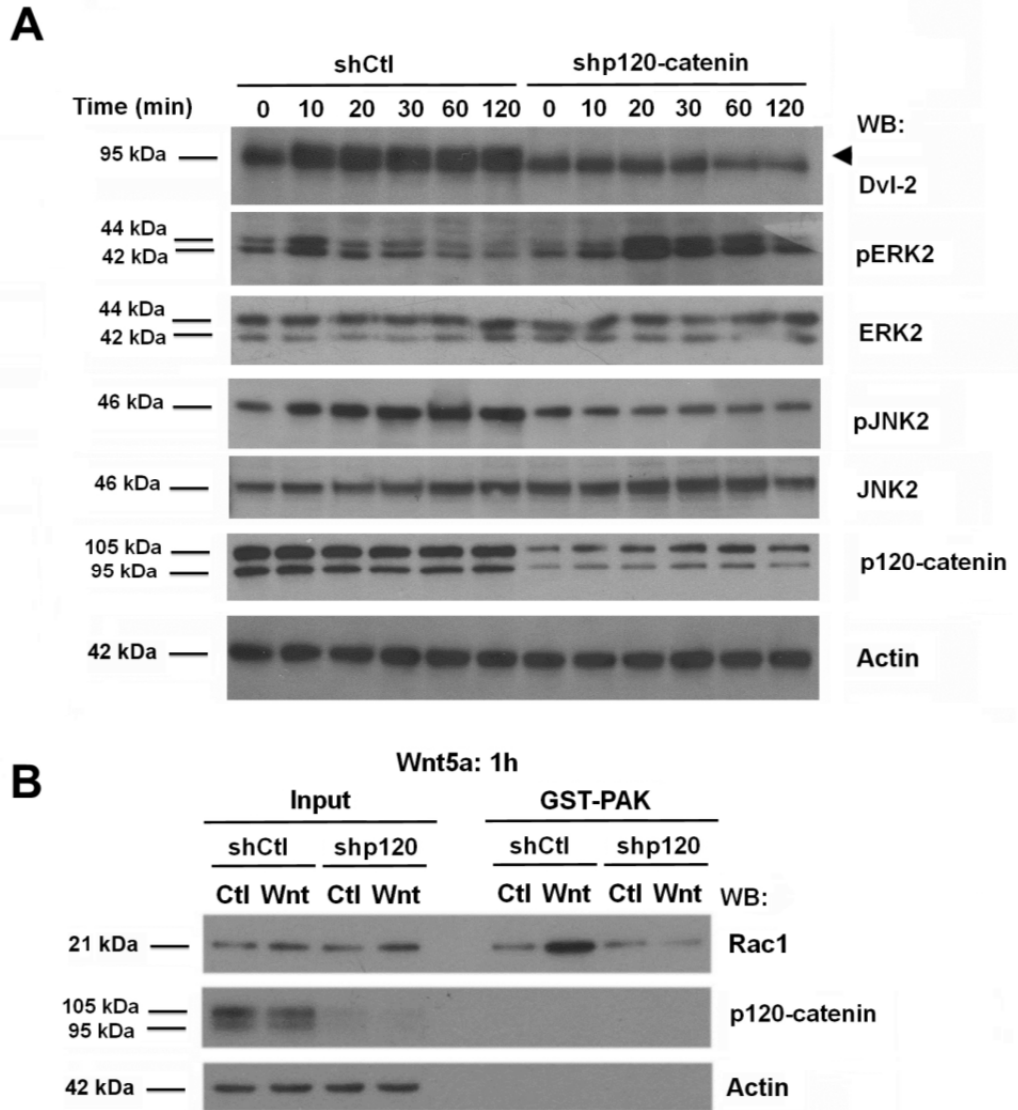

**Fig. S4. p120-catenin deficiency prevents Wnt5a-induced JNK2 phosphorylation and Rac1 activation.** HEK293T cells were depleted of p120-catenin using specific shRNA or a scrambled shRNA as a control. **(A)** Cells were treated with control or Wnt5a-conditioned medium for the indicated times and total levels of phosphorylated proteins were determined by WB with specific antibodies. The arrow indicates phosphorylated Dvl2. **(B)** Cells were treated for 1 h with control or Wnt5a-conditioned medium. GST-PAK pull-down assays were performed and active Rac1 was detected by WB.

**A**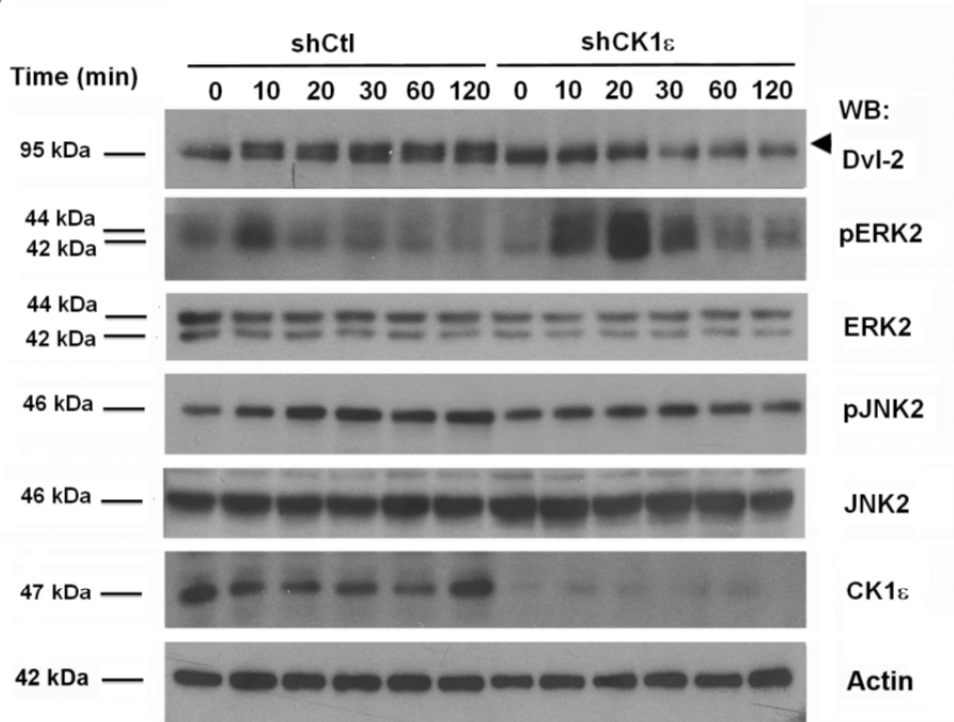**B**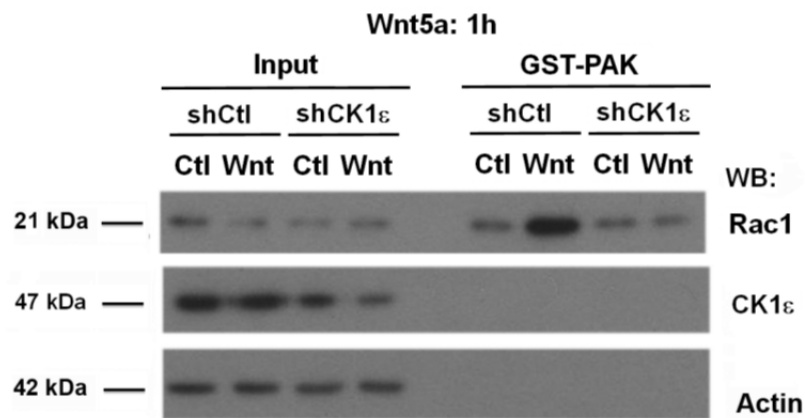

**Fig. S5. CK1 $\epsilon$  deficiency prevents Wnt5a-induced JNK2 phosphorylation and Rac1 activation.** HEK293T cells were depleted of CK1 $\epsilon$  using specific shRNA or a scrambled shRNA as a control. (A) Cells were treated with control or Wnt5a-conditioned medium for the indicated times and total levels of phosphorylated proteins were determined by WB with specific antibodies. The arrow indicates phosphorylated Dvl2. (B) Cells were treated for 1 h with control or Wnt5a-conditioned medium. GST-PAK pull-down assays were performed and active Rac1 was detected by WB.

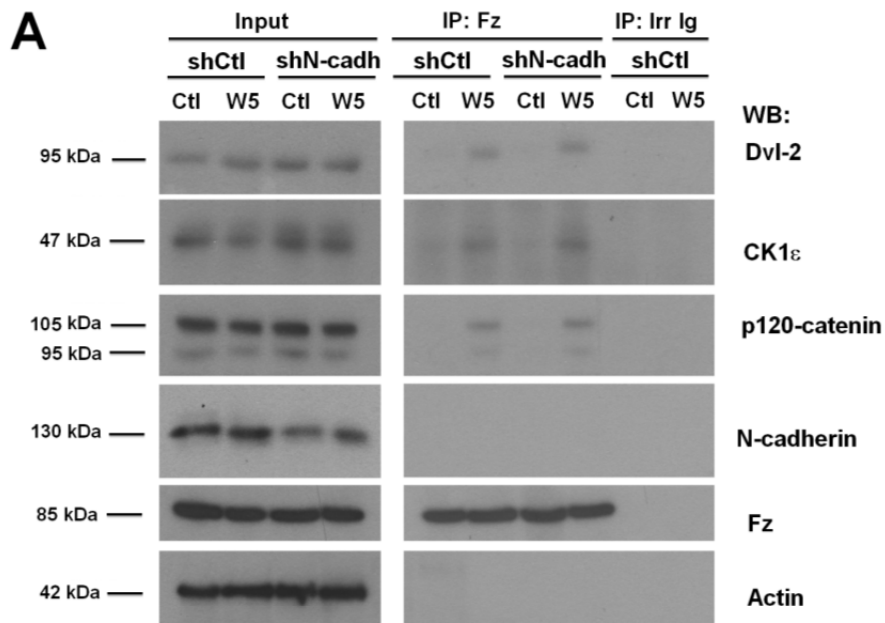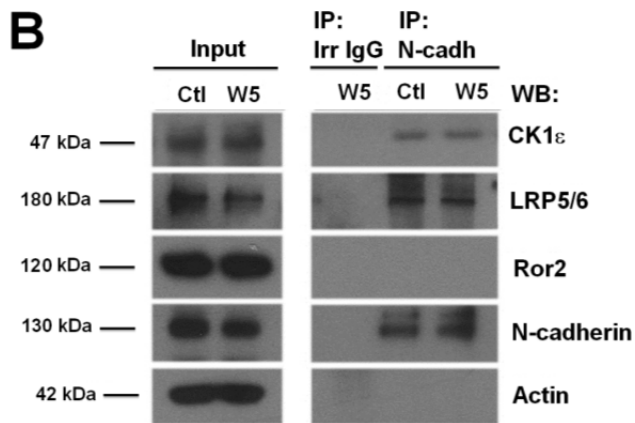

**Fig. S6. N-cadherin is not required for Wnt5a signaling.** (A) HEK293T cells were depleted of N-cadherin using a specific shRNA or a scrambled shRNA as a control. Cells were treated with control or Wnt5a-conditioned medium for 1h; Fz2 was immunoprecipitated from cell extracts and associated proteins were determined by WB. (B) N-cadherin was immunoprecipitated from extracts of cells treated with Wnt5a for 1 h when indicated. Immunocomplexes were analyzed by WB.

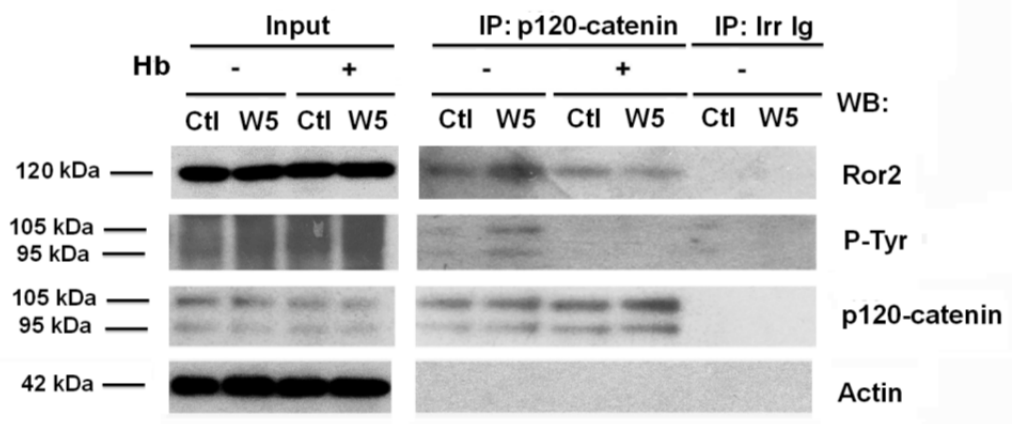

**Fig. S7. Herbimycin decreases Wnt5a-induced p120-catenin phosphorylation and interaction with Ror2.** When indicated HEK293T cells were pretreated for 1 h with Hb (20 ng.mL<sup>-1</sup>) and then stimulated with control or Wnt5a-conditioned medium for additional 5 min. Cells were lysed and p120-catenin was immunoprecipitated. Tyrosine phosphorylated p120-catenin and associated Ror2 were analyzed by WB.

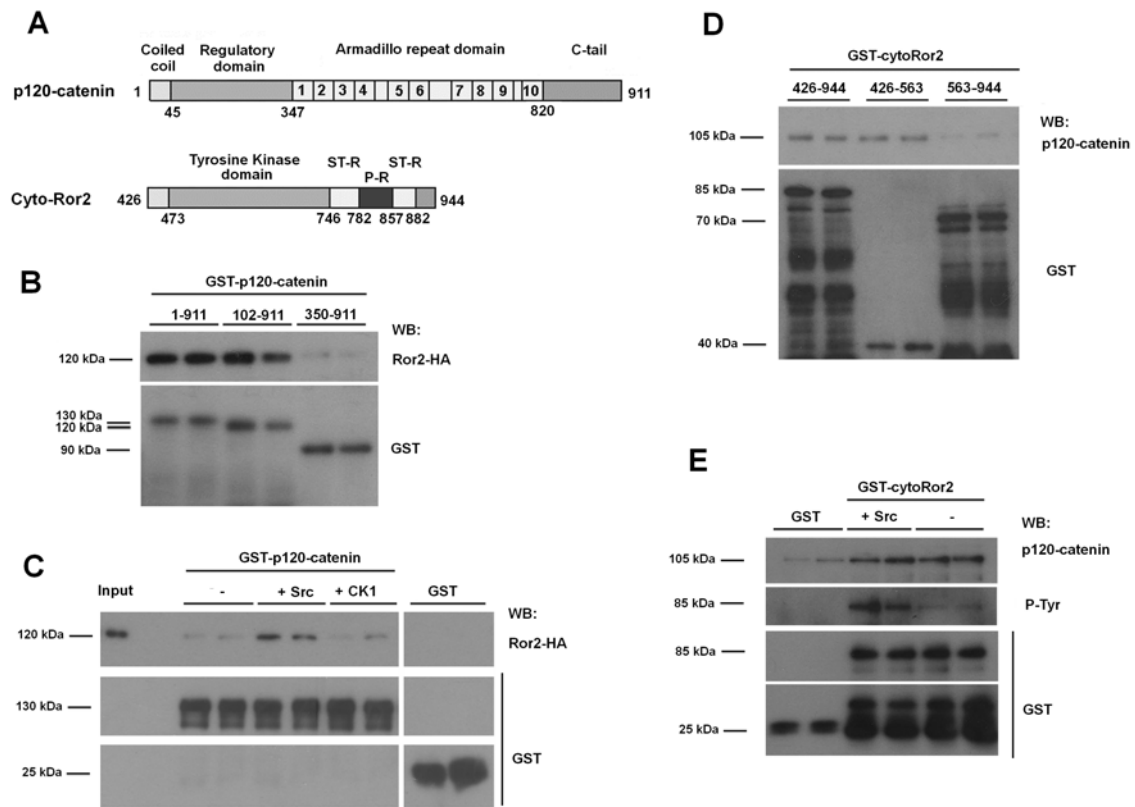

**Fig. S8. Ror2 and p120-catenin interact.** (A) Diagram of p120-catenin isoform 1 and the cytosolic region of Ror2 (cyto-Ror2) illustrating the different protein domains. ST-R and P-R indicate the Ser-Thr and Pro-rich domains. (B) GST-p120-catenin fusion proteins (7 pmol) were incubated with cells extracts overexpressing Ror2-HA and treated with Wnt5a-conditioned medium for 5 min. A pull-down assay was performed and bound Ror2-HA was analyzed by WB with anti-HA. (C) Full-length GST-p120-catenin (7 pmol) was in vitro phosphorylated with recombinant Src or CK1 kinases. A pull-down assay was performed by incubating the fusion proteins with cell extracts overexpressing Ror2-HA. Protein complexes were affinity purified and analyzed by WB. (D) Different GST-cytoRor2 fusion proteins (0.5 pmol) were incubated with recombinant p120-catenin (2 pmol). Protein complexes were affinity purified and analyzed by WB with anti-p120-catenin. (E) GST-cytoRor2 (amino acids 426-944) was in vitro phosphorylated with recombinant Src kinase for 2 h. A binding assay was performed by incubating 2 pmol of GST-cytoRor2 with 1 pmol of recombinant p120-catenin.



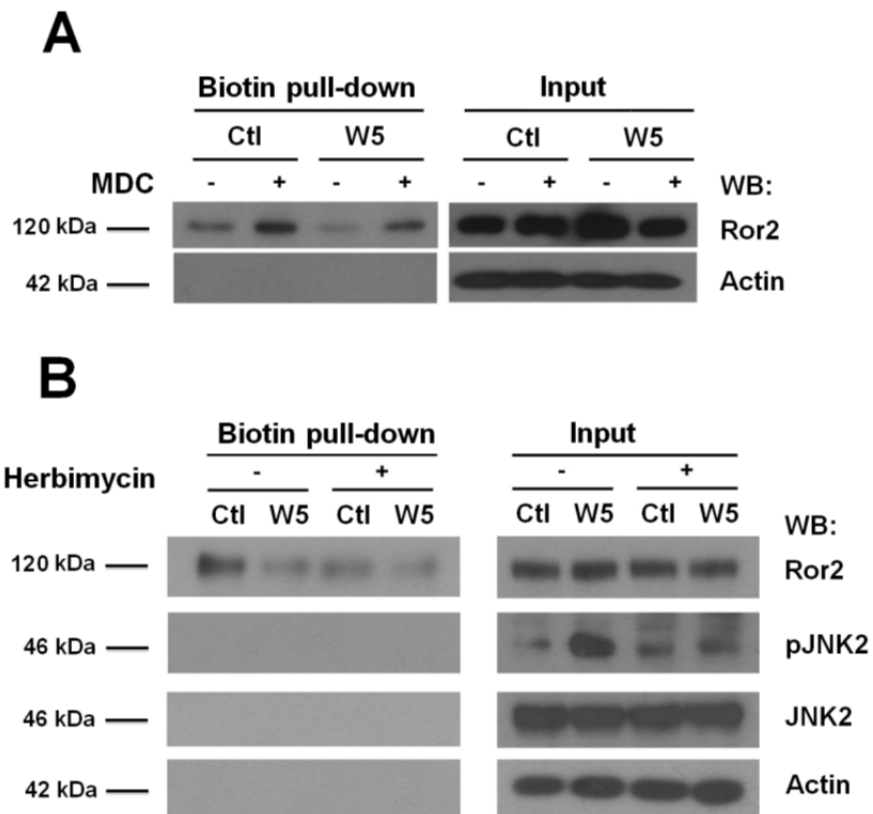

**Fig. S9. Herbimycin promotes Ror2 internalization.** HEK293T cells pretreated with monodansylcadaverine (MDC, 50  $\mu$ M) for 30 min in (A) or Hb (20 ng.mL<sup>-1</sup>) for 1 hour in (B). Then, cells were stimulated with control or Wnt5a-conditioned medium with the corresponding inhibitor for additional 20 min. Surface proteins were biotinylated and a pull-down assay was performed with NeutrAvidin Agarose. Biotinylated Ror2 and phosphorylated JNK were analyzed by WB with specific antibodies.

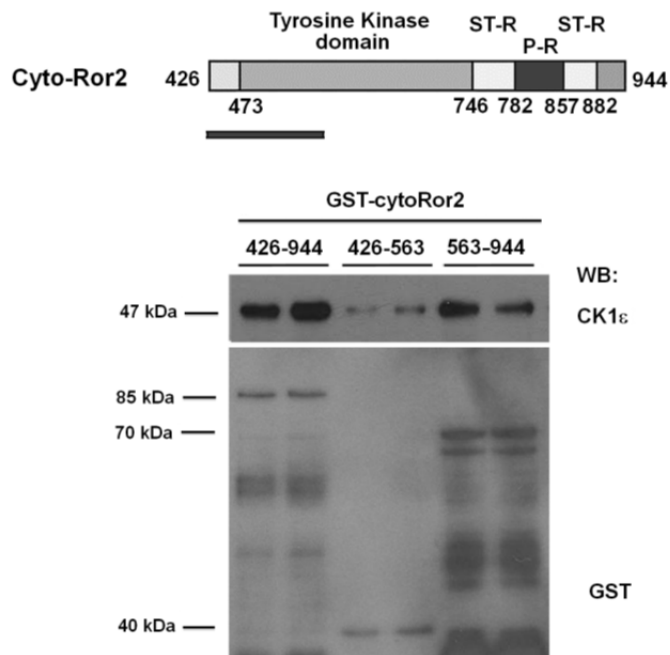

**Fig. S10. CK1 $\epsilon$  binds to the C-terminal domain of Ror2.** Different GST-cytoRor2 fragments (0.5 pmol) were incubated with recombinant CK1 $\epsilon$  (2 pmol). Protein complexes were affinity purified and analyzed by WB with anti-CK1 $\epsilon$ . The bar under the diagram indicates the p120-catenin binding element in Ror2 as determined in Fig. S8.

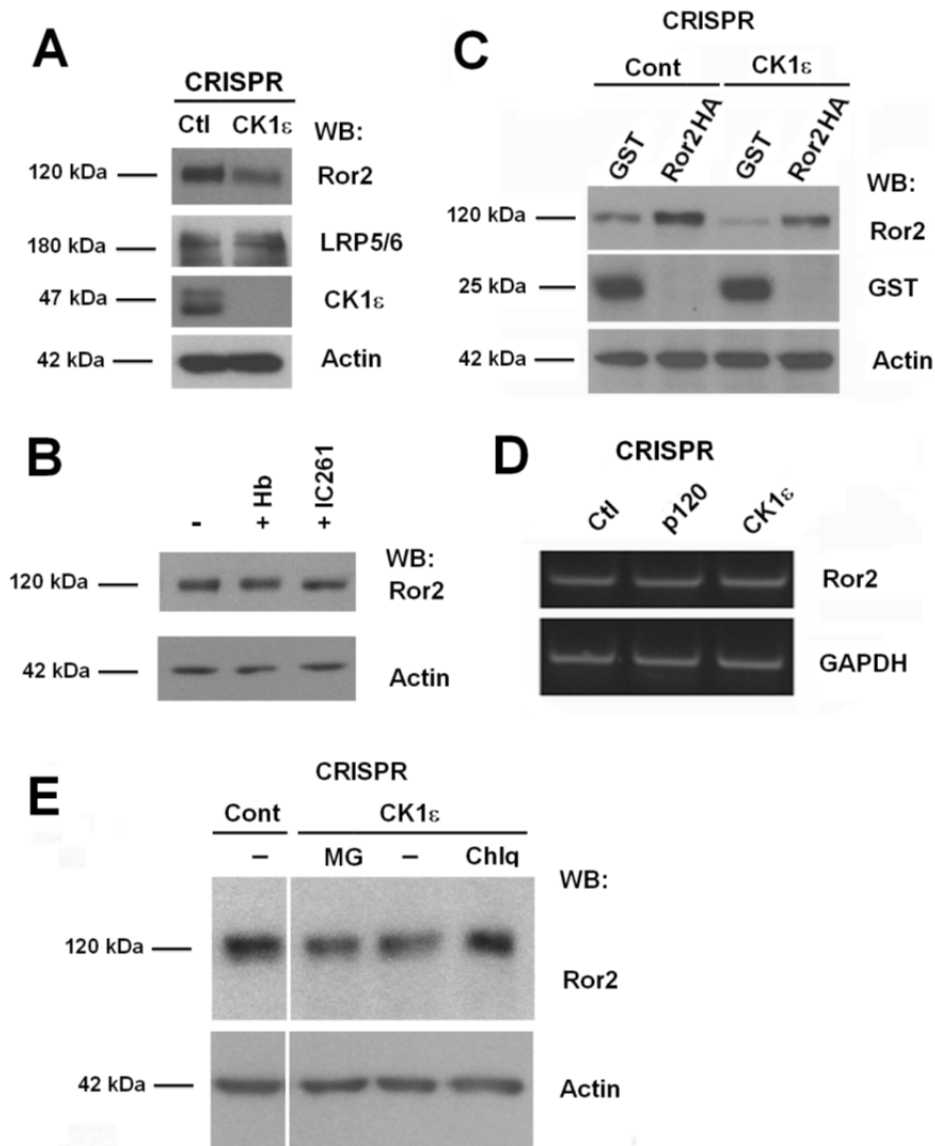

**Fig. S11. CK1ε depletion decreases Ror2 protein stability but not Ror2 RNA levels.** (A) Cell extracts from control or CRISPR CK1ε-depleted HEK293T cells were analyzed by WB. (B) HEK293T cells were treated with Hb (20 ng.mL<sup>-1</sup>) or IC261 (15 μM) for 1 hour. Total Ror2 protein levels were analyzed by WB with an anti-Ror2 antibody. (C) Total Ror2 protein levels were determined by WB in control or CK1ε CRISPR cells overexpressing Ror2-HA or GST for 48 hours. (D) RNA was isolated from control and CK1ε CRISPR cells. Ror2 RNA levels were measured by semi-quantitative RT-PCR. (E) Control or CK1ε HEK293T CRISPR were treated with MG132 (MG, 10 μM) or Chloroquine (Chlq, 150 μM) for 6 hours; cells extracts were prepared and Ror2 or Actin were analyzed by WB.

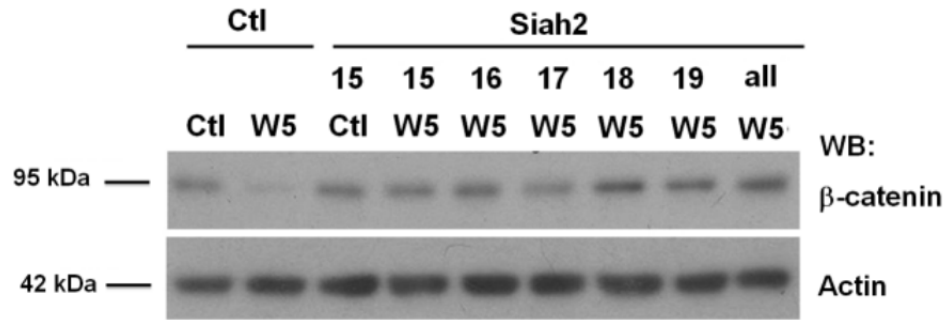

**Fig. S12. Siah2 shRNA prevents  $\beta$ -catenin down-regulation caused by Wnt5a.** HEK293T cells were depleted of Siah2 using a specific shRNA or scrambled. After 48 hours, cells were stimulated with control or Wnt5a-conditioned medium overnight, and  $\beta$ -catenin protein levels were analyzed by WB from total cell extracts.

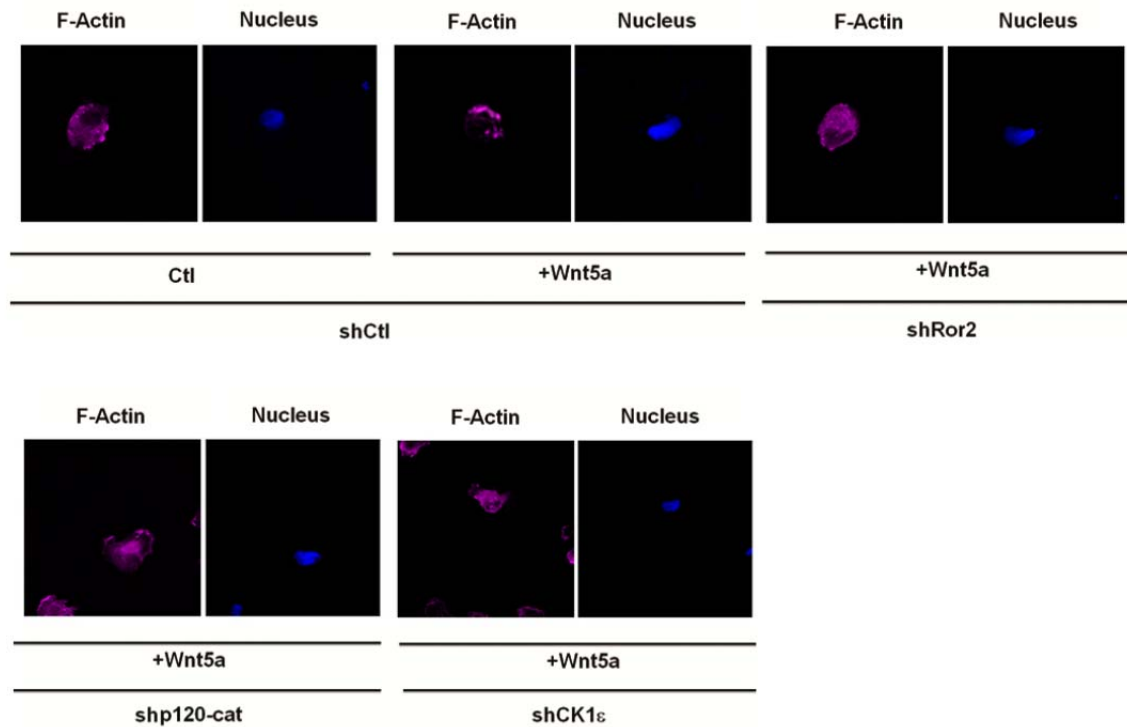

**Fig. S13. Ror2, p120-catenin and CK1 $\epsilon$  are required for Wnt5a-induced asymmetrical distribution of cortical actin in IEC-18 cells.** IEC-18 cells were transfected with the indicated shRNAs and a GFP-expression plasmid; after 24 hours cells were plated on Matrigel for 2h with control or Wnt5a-conditioned medium, fixed and stained for F-Actin and nucleus with Dapi. A GFP-positive cell showing a representative actin staining in the indicated conditions is shown.

| Antibody                                      | Supplier                   | Reference   | Assay                            |
|-----------------------------------------------|----------------------------|-------------|----------------------------------|
| Axin                                          | Santa Cruz Biotechnologies | sc-14029    | WB                               |
| $\beta$ -Actin                                | Sigma                      | A5441       | WB                               |
| $\beta$ -catenin                              | BD Biosciences             | 610153      | WB                               |
| CK1 $\gamma$                                  | Abcam                      | ab64829     | WB/IP                            |
| CK1 $\epsilon$                                | BD Biosciences             | 610445      | WB/IP                            |
| CK1 $\delta$                                  | Abcam                      | ab48031     | WB                               |
| Dvl2                                          | Cell Signaling             | 3216        | WB                               |
| EEA1                                          | BD Biosciences             | 610457      | WB                               |
| ERK1/2                                        | Cell Signaling             | 9107        | WB                               |
| Fz (total)                                    | Santa Cruz Biotechnologies | sc-9169     | WB/IP                            |
| Fz2                                           | Abcam                      | ab52565     | WB/IP                            |
| GST                                           | GE Healthcare              | 27457701    | WB                               |
| HA                                            | Roche                      | 11867423001 | WB/IP                            |
| JNK2                                          | Abcam                      | ab178953    | WB                               |
| LRP6                                          | Santa Cruz Biotechnologies | sc-15399    | WB                               |
| Na <sup>+</sup> , K <sup>+</sup> ATPase       | Abcam                      | ab7671      | WB                               |
| N-cadherin                                    | BD Biosciences             | 610921      | WB/IP                            |
| p120-catenin                                  | BD Biosciences             | 610134      | WB/IP                            |
| Phospho ERK 1/2<br>(Thr202/Tyr204)            | Cell Signaling             | 4370        | WB                               |
| Phospho JNK (Thr183/Tyr185,<br>Thr221/Tyr223) | Millipore                  | 07-175      | WB                               |
| Phospho p120-catenin (Ser 268)                | Santa Cruz Biotechnologies | sc-293000   | WB                               |
| Phospho LRP5/6 (Thr1490)                      | Cell Signaling             | 2568        | WB                               |
| Phospho Tyrosine                              | BD Biosciences             | 610000      | WB/IP                            |
| PR61 $\epsilon$                               | Jin et al. 2009            |             | WB                               |
| Rac1                                          | BD Biosciences             | 610650      | WB                               |
| Ror2                                          | Santa Cruz Biotechnologies | sc-374174   | WB/IP                            |
| Wnt5a                                         | R&D System                 | AF645       | Wnt5a-specific<br>neutralization |

**Table S1: List of antibodies used in this work.** The table indicates the source, catalogue number and use in Western Blot (WB) or immunoprecipitation (IP) experiments of all the antibodies employed in this article.
