# Supplementary material for: CK1ε and p120‐catenin control Ror2 function in noncanonical Wnt signaling
Source: PubMed Central journal article supplement (PMC5928365; doi:10.1002/1878-0261.12184), 2018-03-14
Supplement: MOL2-12-611-s015.pdf [file MOL2-12-611-s015.pdf]

### CK1 $\epsilon$ and p120-catenin control Ror2 function in non-canonical Wnt signaling

Josué Curto, Beatriz Del Valle-Pérez, Aida Villarroel, Guillem Fuertes, Meritxell Vinyoles,

Raúl Peña, Antonio García de Herreros and Mireia Duñach

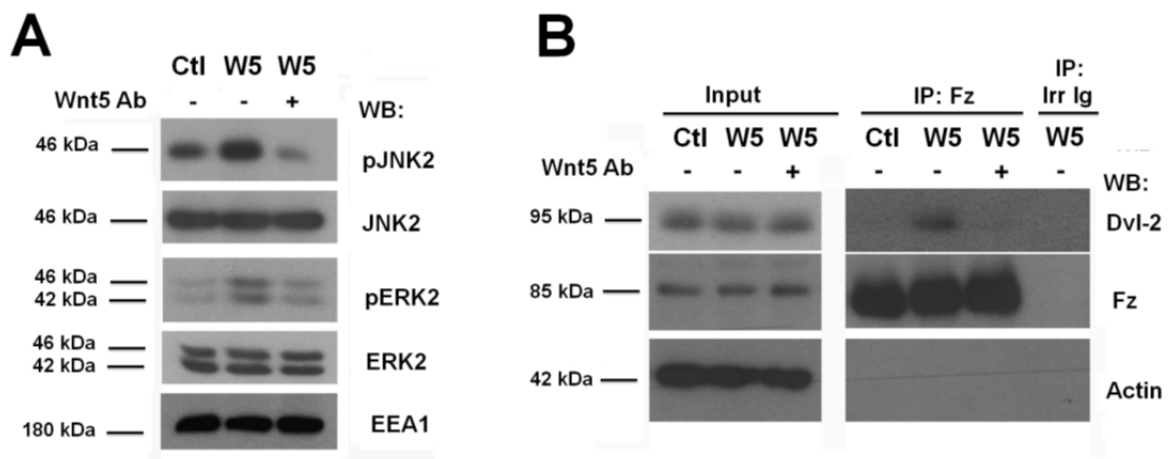

Figure S1

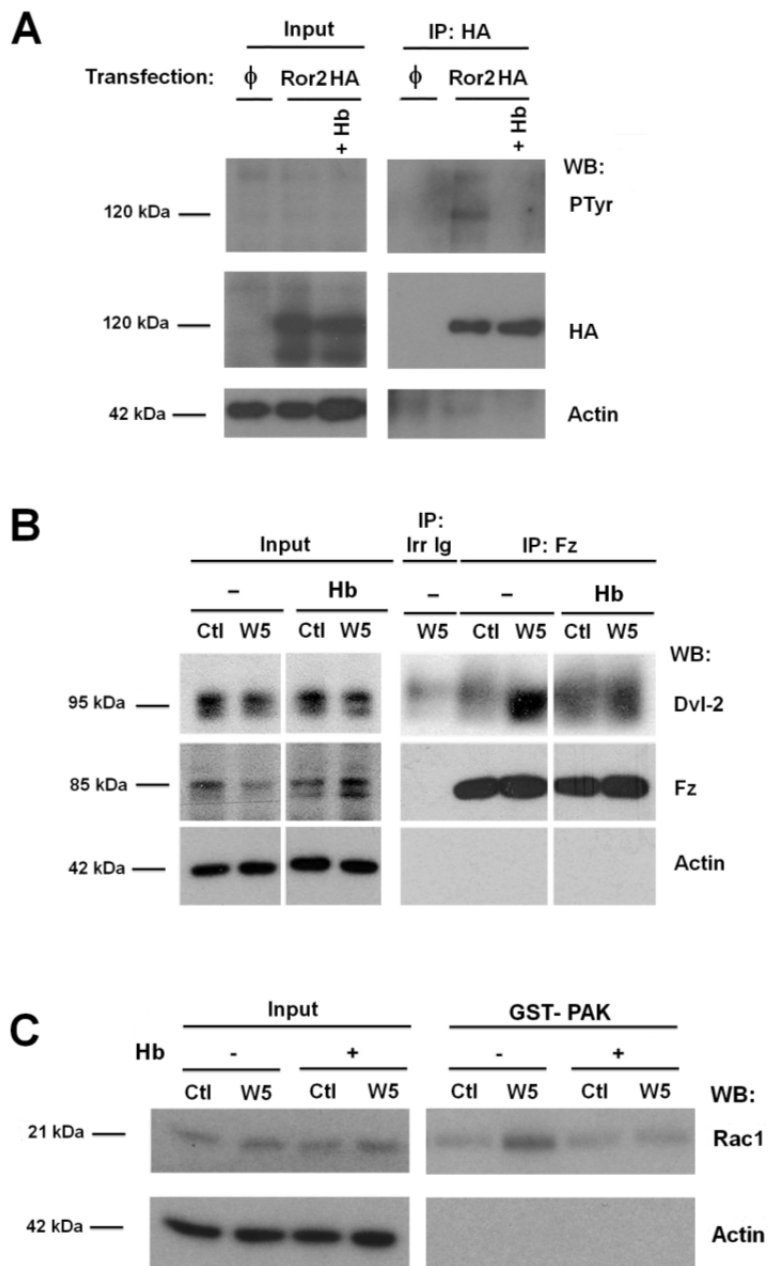

**Figure S2**

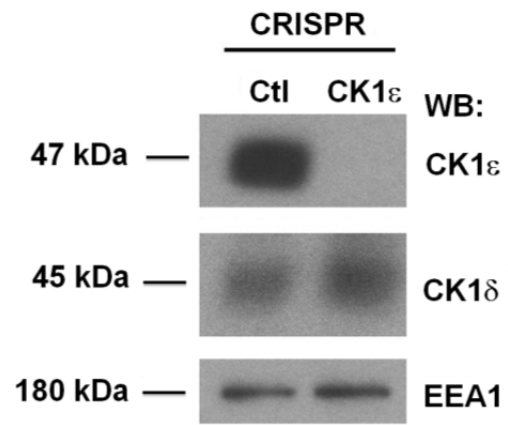

**Figure S3**

**A**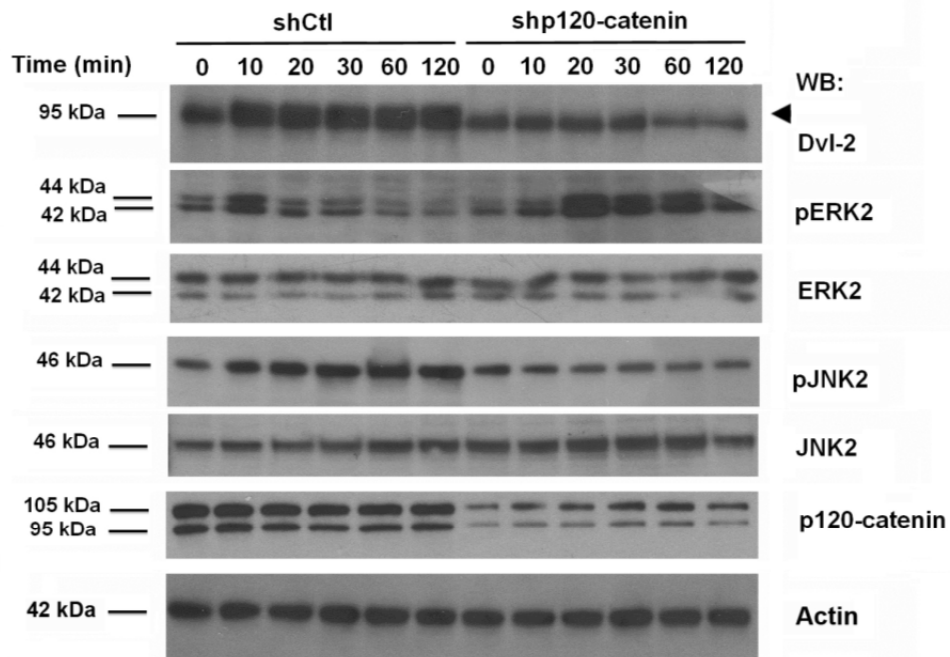**B**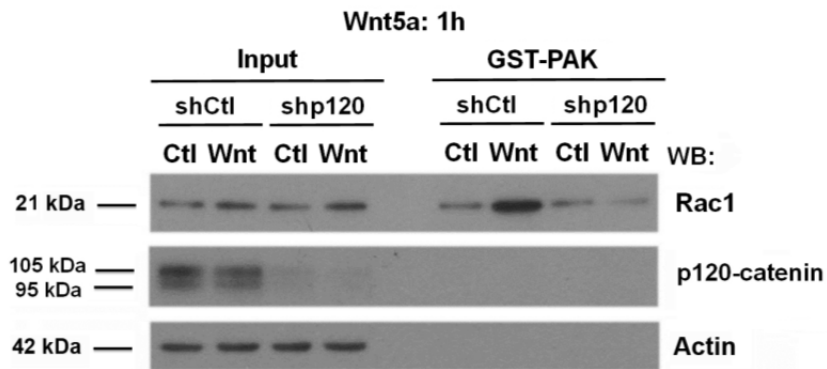**Figure S4**

**A**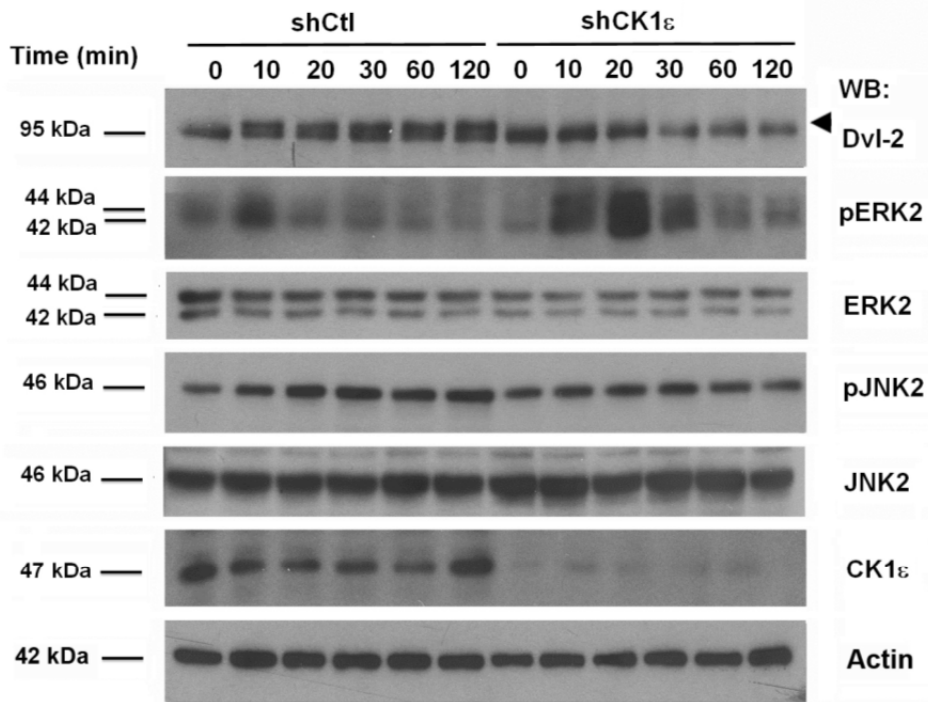**B**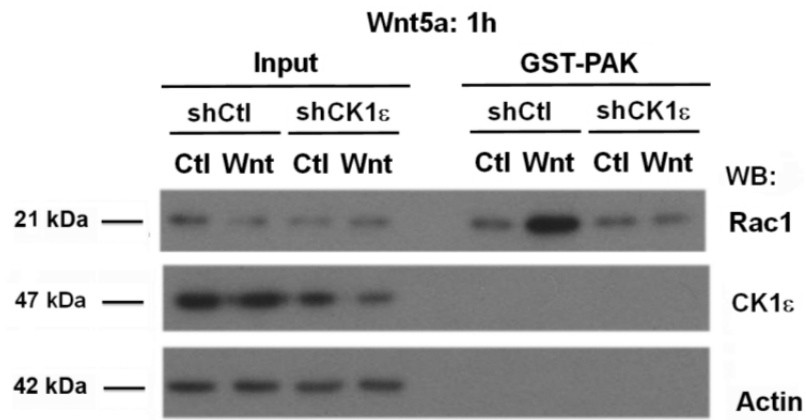**Figure S5**

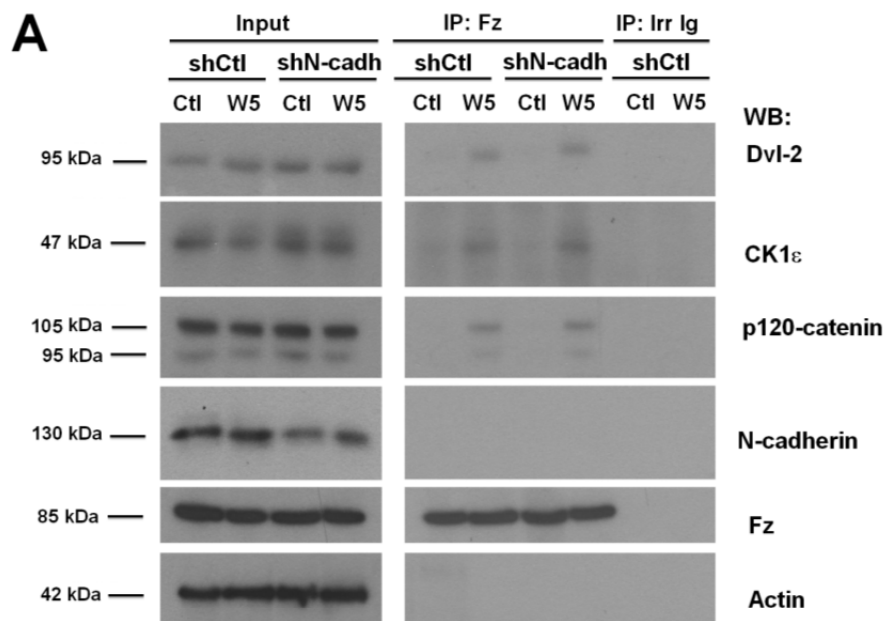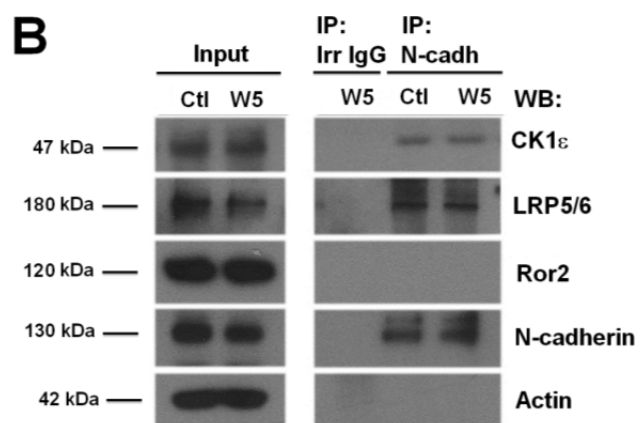

**Figure S6**

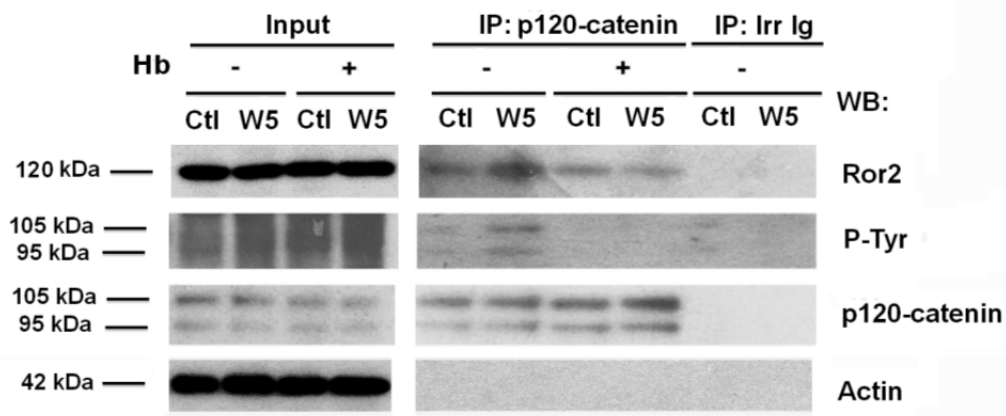

**Figure S7**

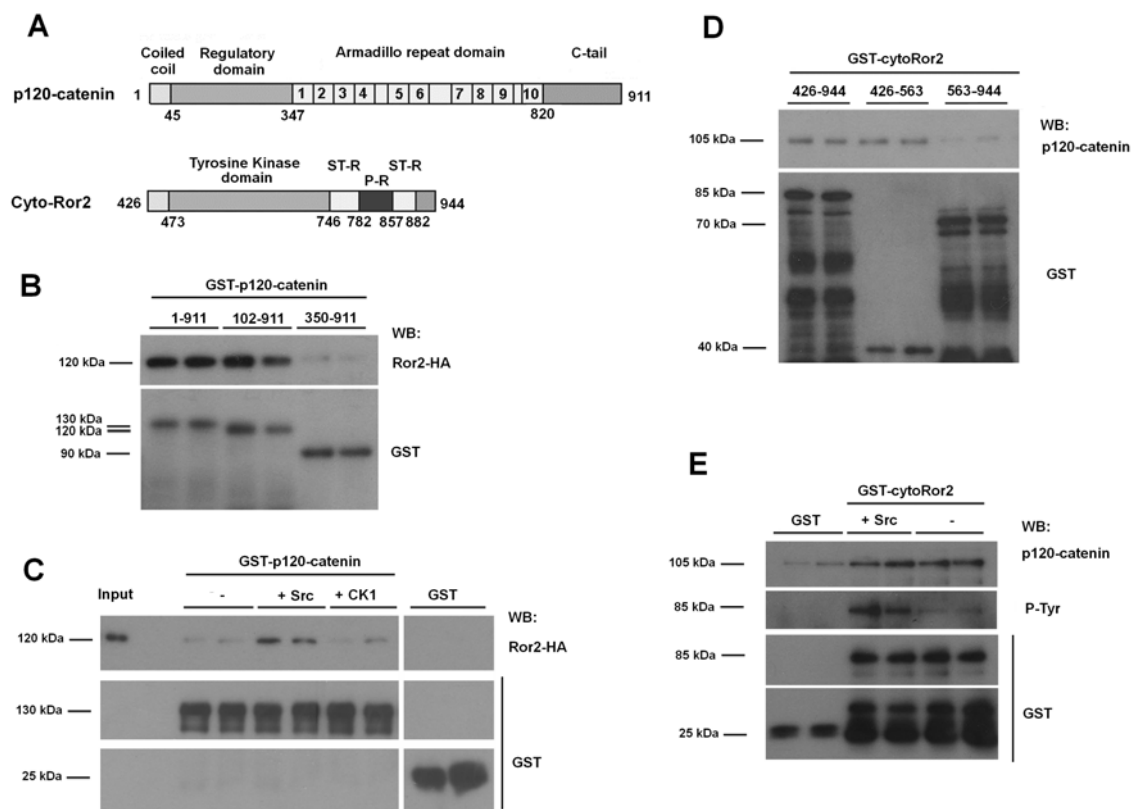

**Figure S8**



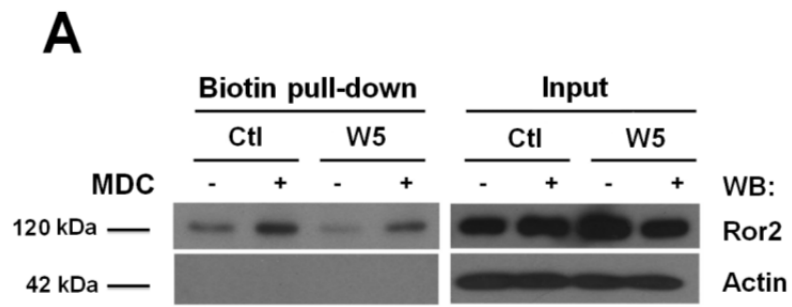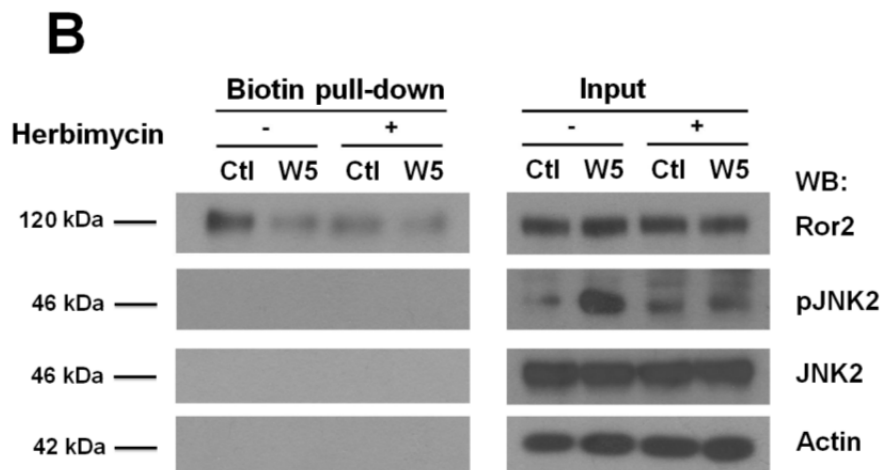

**Figure S9**

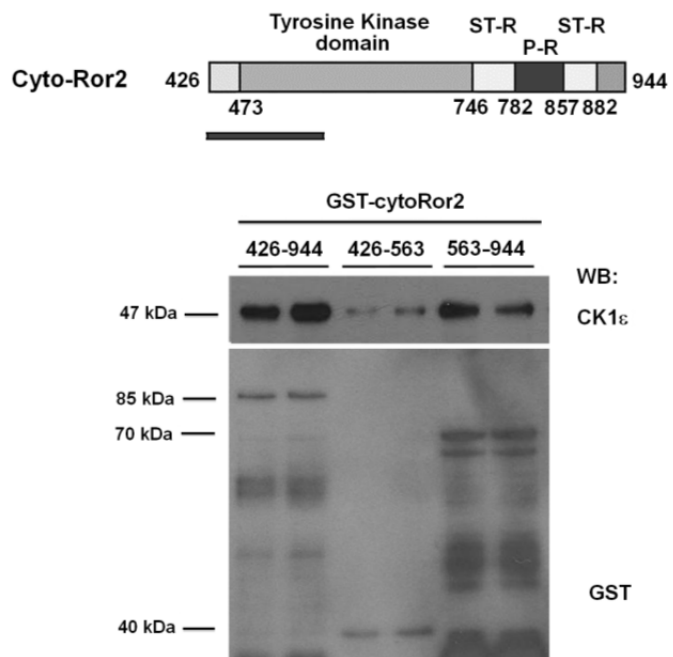

**Figure S10**

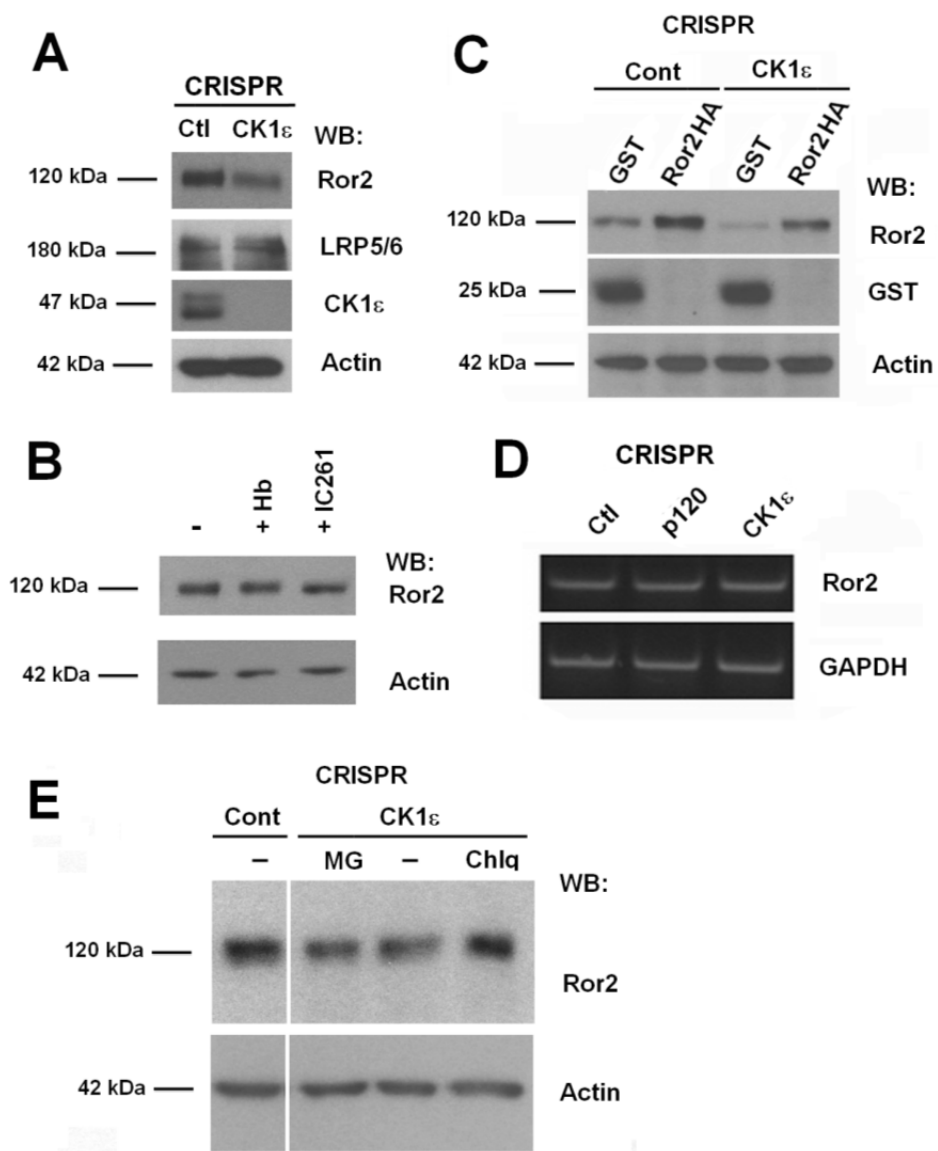

**Figure S11**

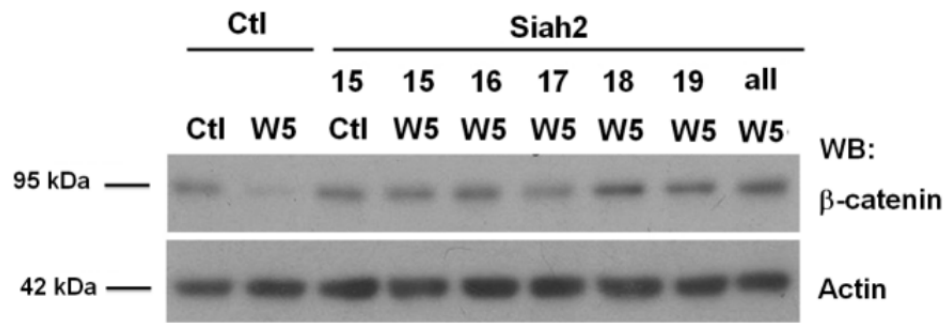

**Figure S12**

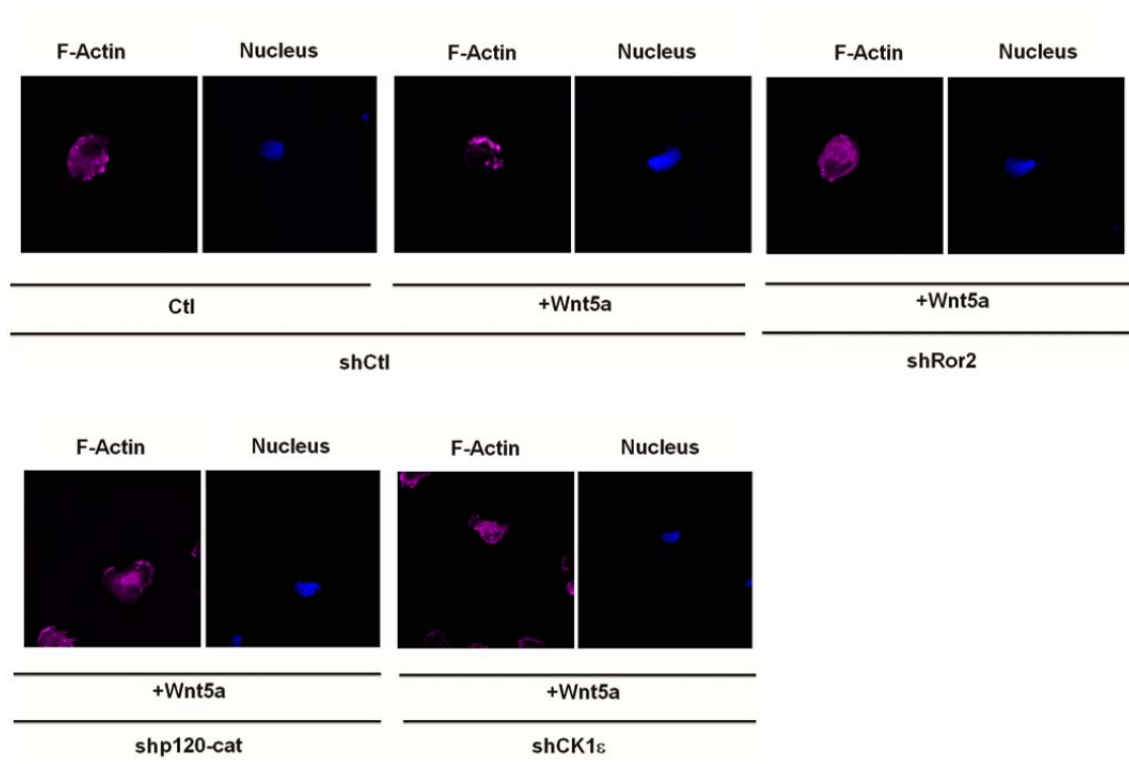

**Figure S13**
